# Supplementary material for: Beneficial effects of sulfated polysaccharides from the red seaweed Gelidium pacificum Okamura on mice with antibiotic-associated diarrhea
Source: Royal Society of Chemistry journal article supplement (doi:10.1039/d0fo00598c), 2020-01-01
Supplement: d0fo00598c1.pdf [file d0fo00598c1.pdf]

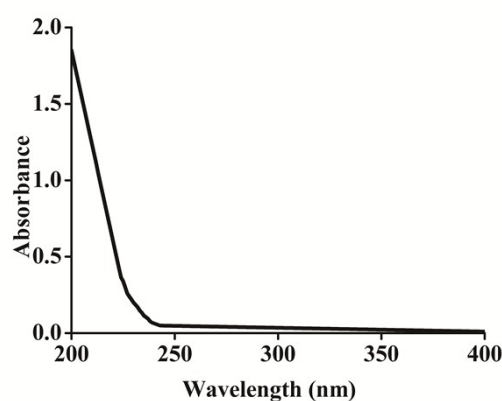

**Fig. S1.** Ultraviolet spectra of GOP-1 in the range of 200-400 nm

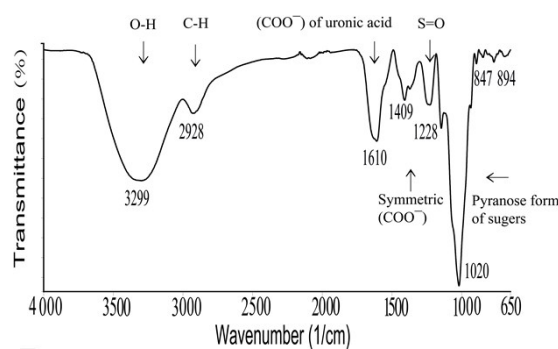

**Fig. S2.** FT-IR spectra of GOP-1.

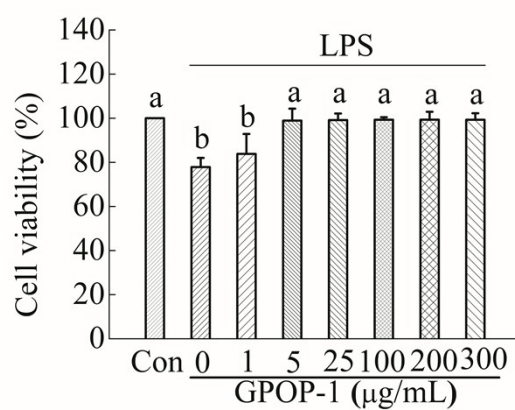

**Fig. S3.** Effects of GOP-1 on cell viability.
